# Supplementary material for: Exotic lagomorph may influence eagle abundances and breeding spatial aggregations: a field study and meta-analysis on the nearest neighbor distance
Source: PeerJ journal article supplement (doi:10.7717/peerj.4746), 2018-05-10

## Buteo buteo

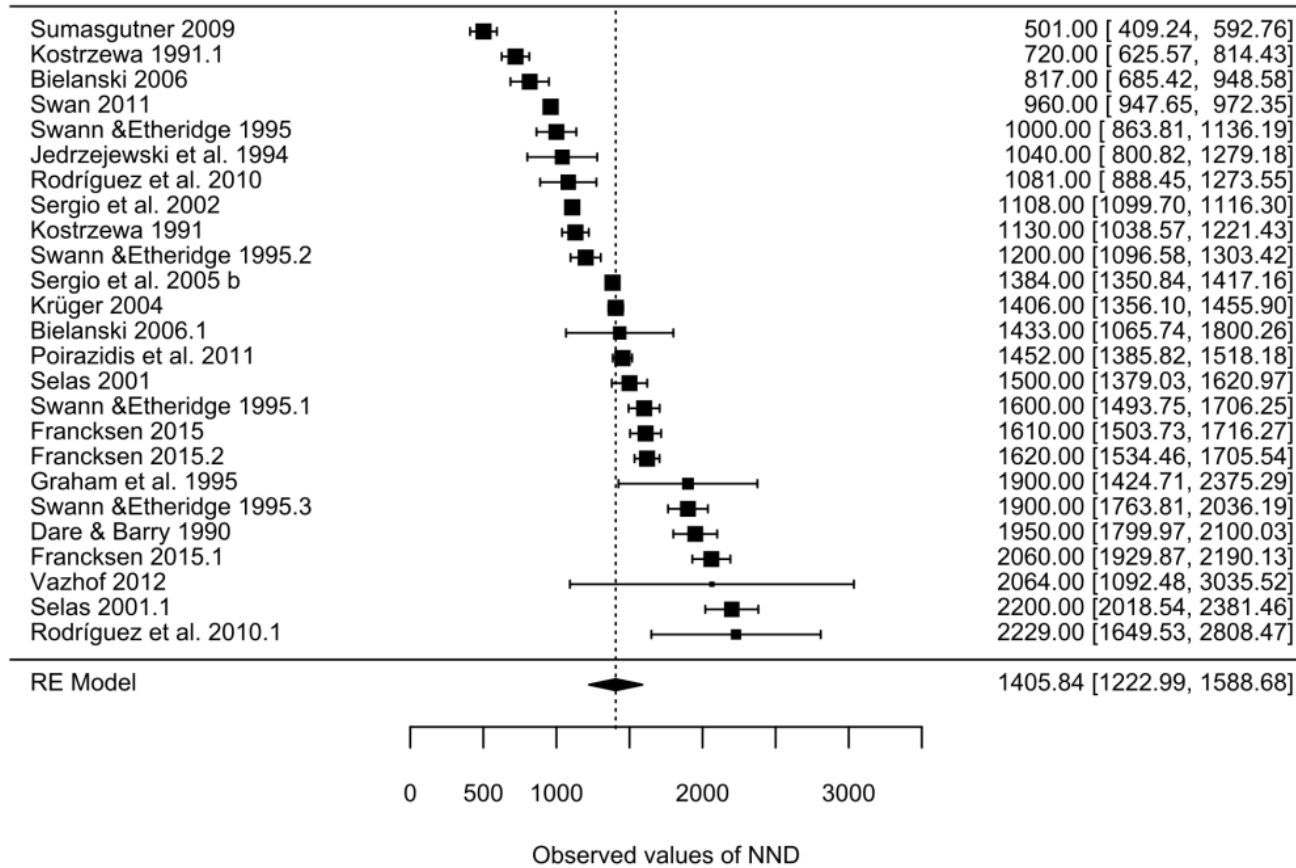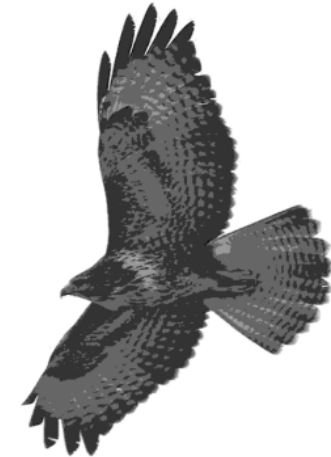

## Hieraaetus wahlbergi

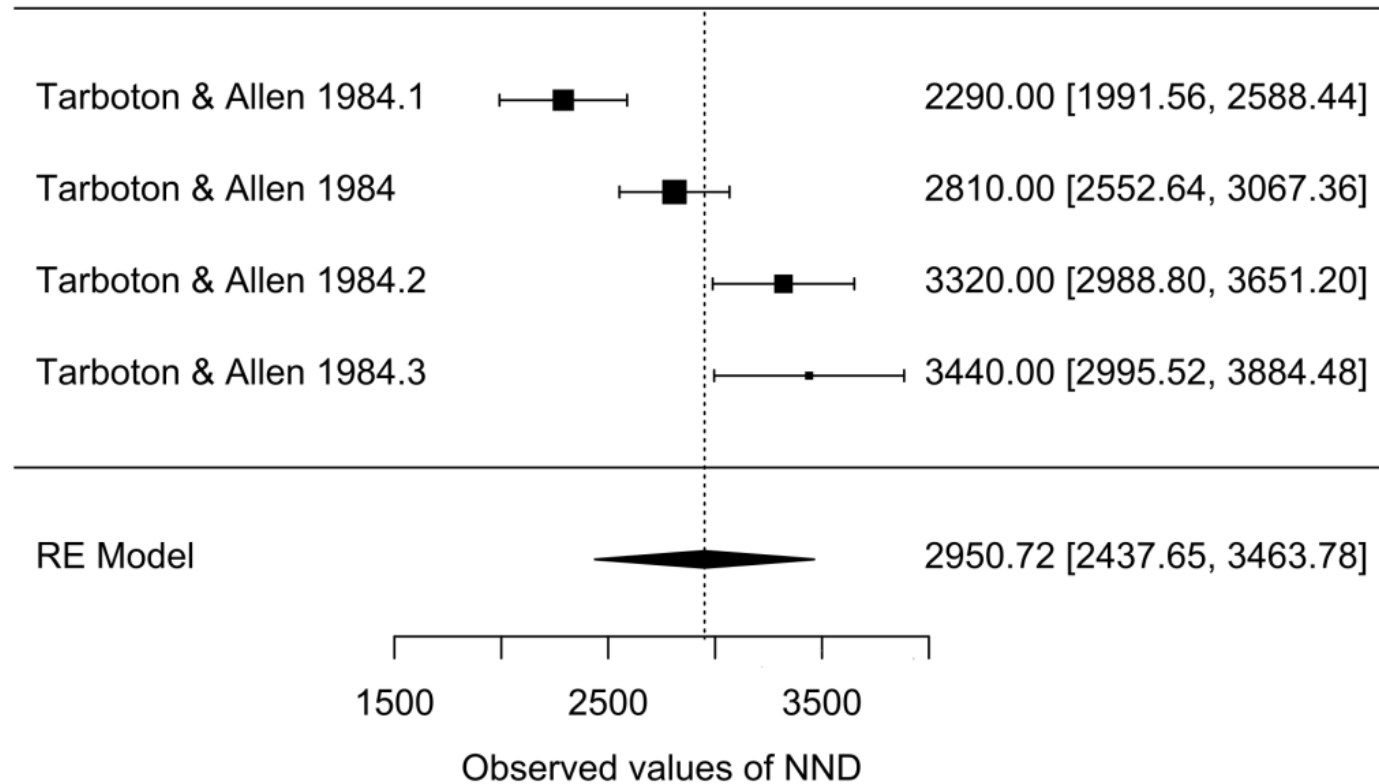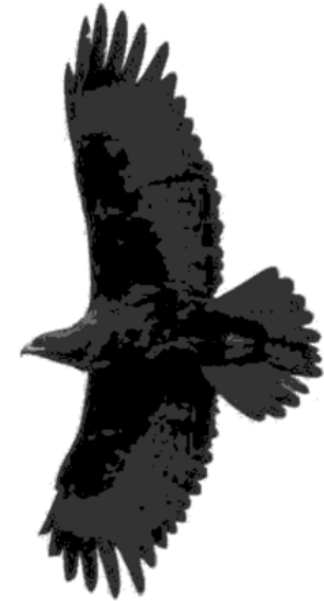

## Buteo augur

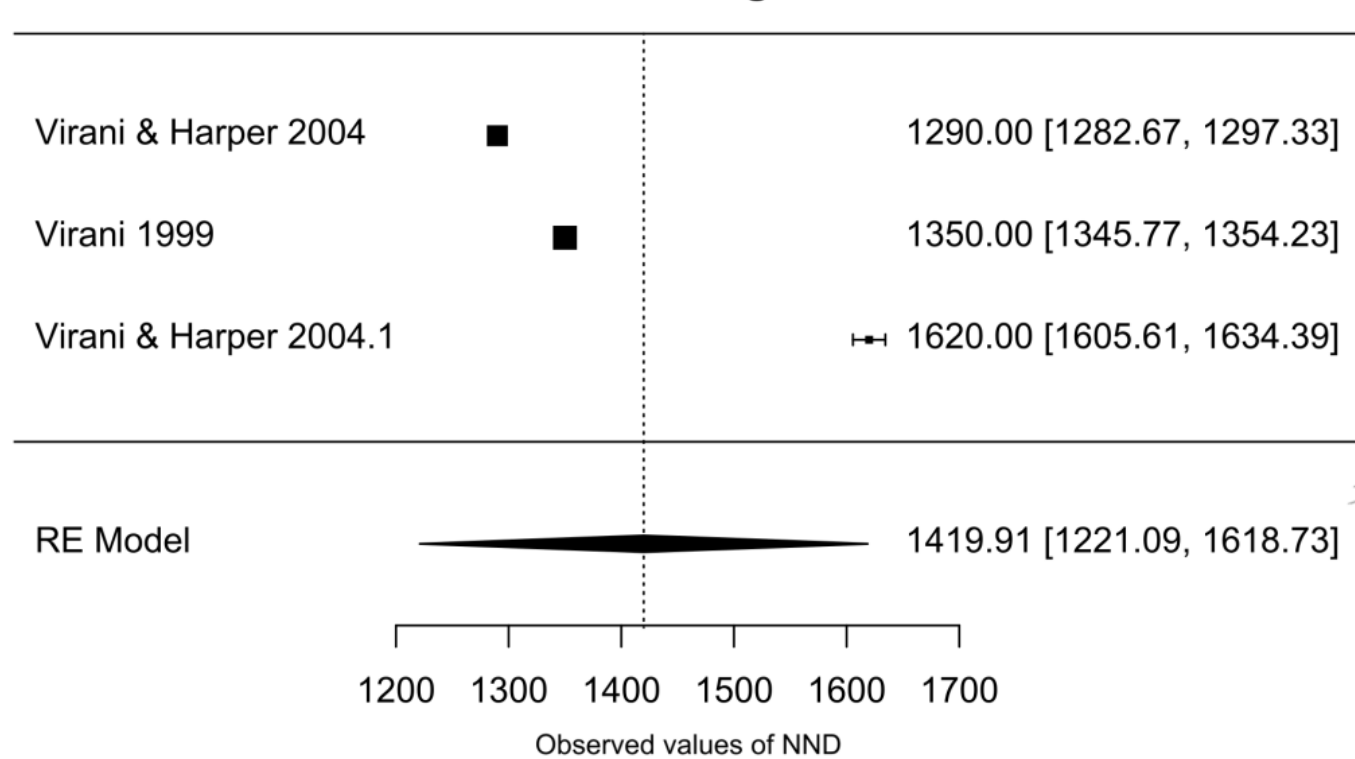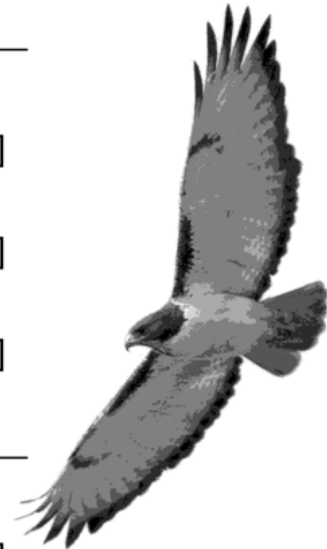

## **Buteo jamaicensis**

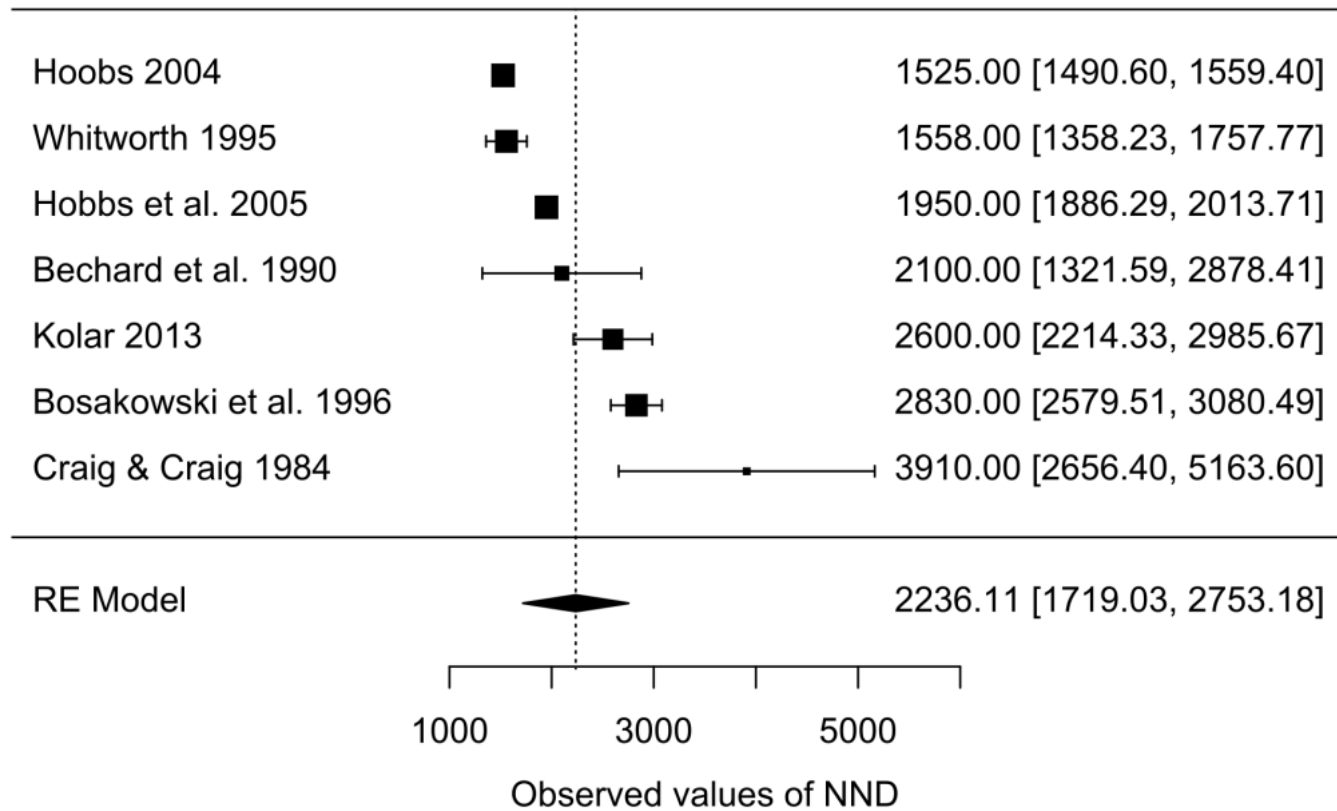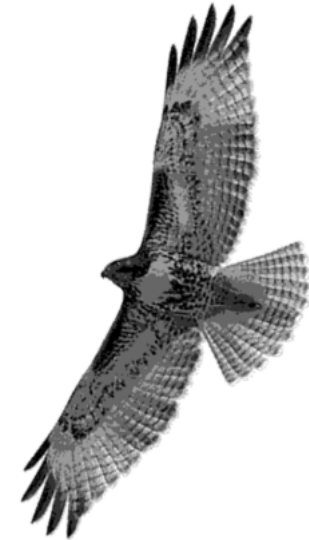

## Buteo swainsoni

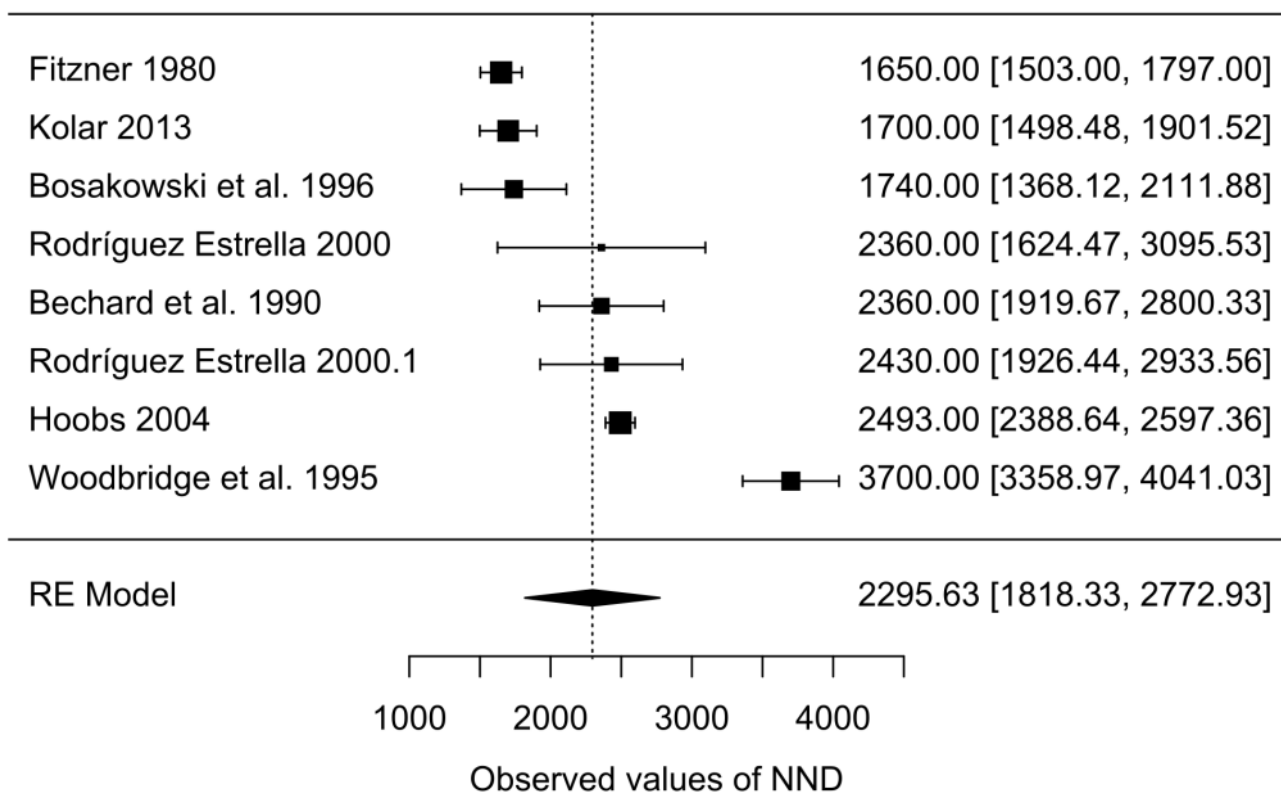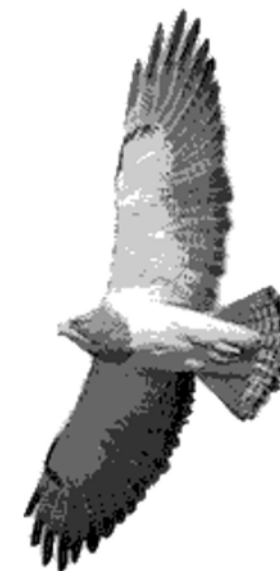

## Buteo regalis

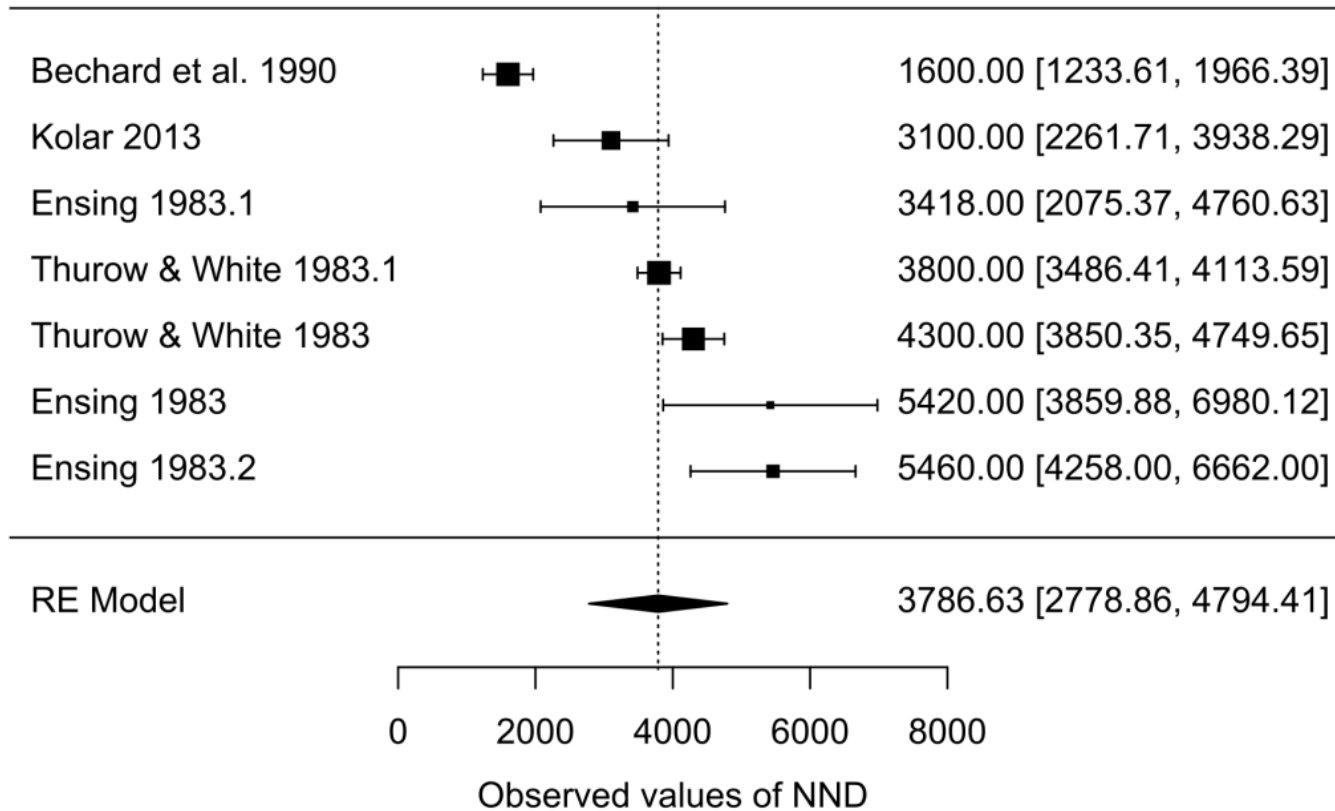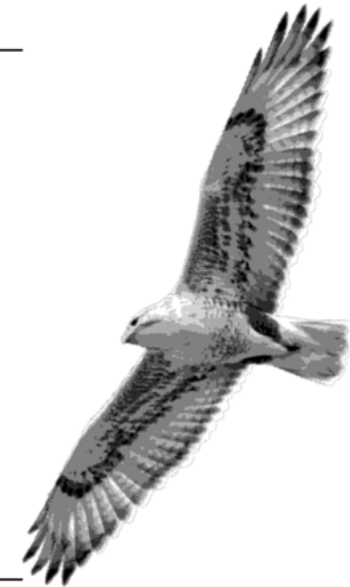

## Clanga pomarina

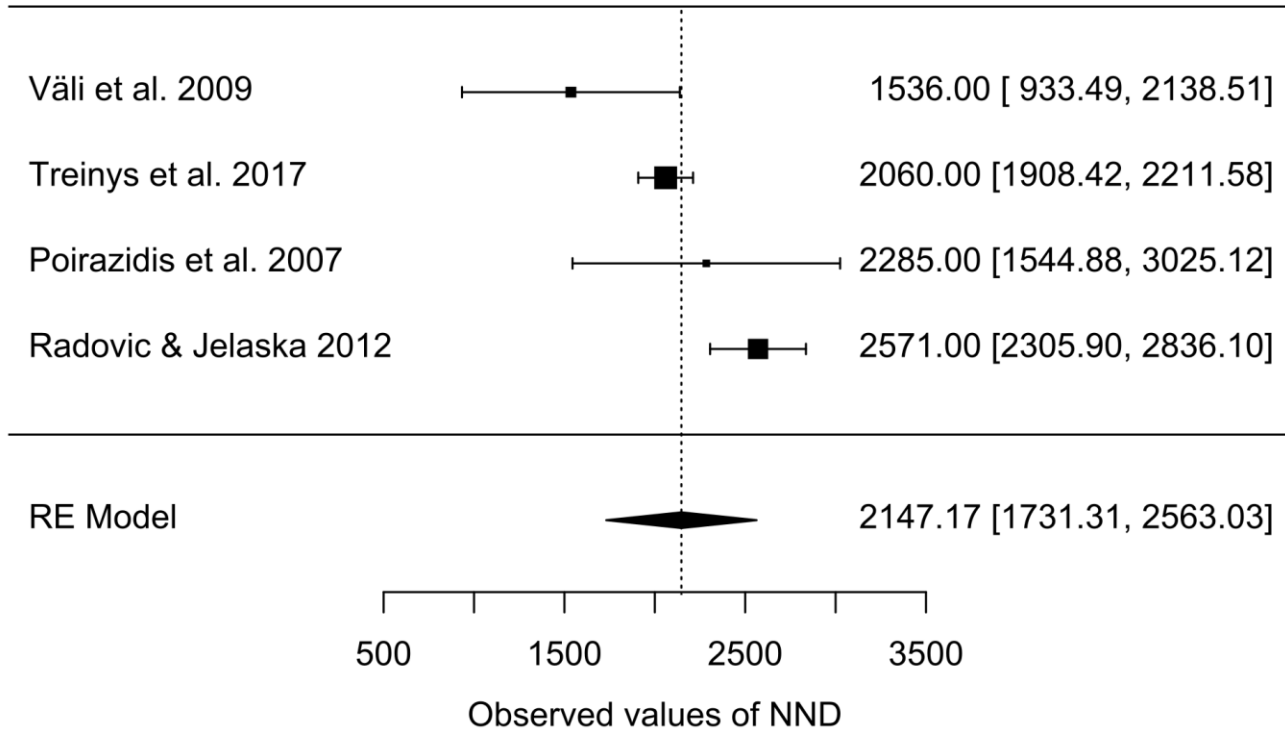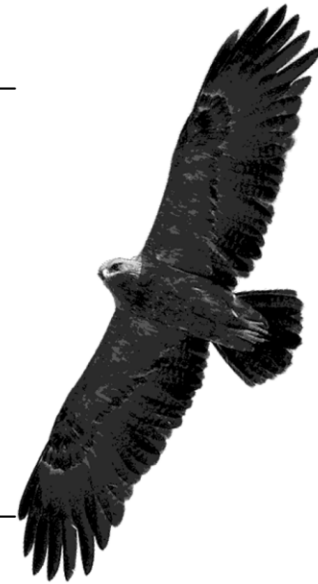

## Aquila rapax

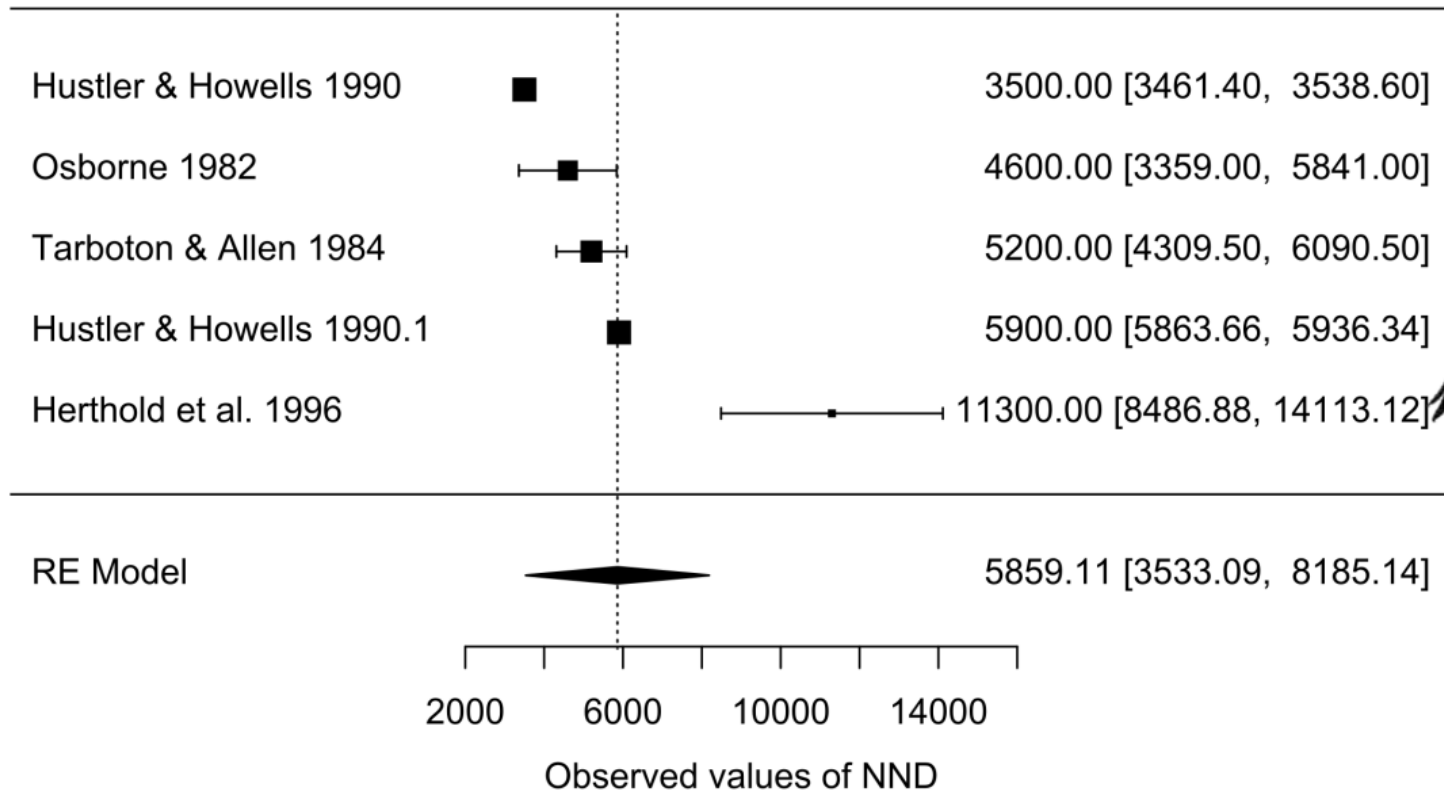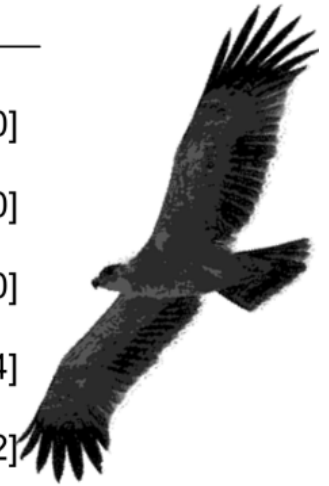



## Terathopius ecaudatus

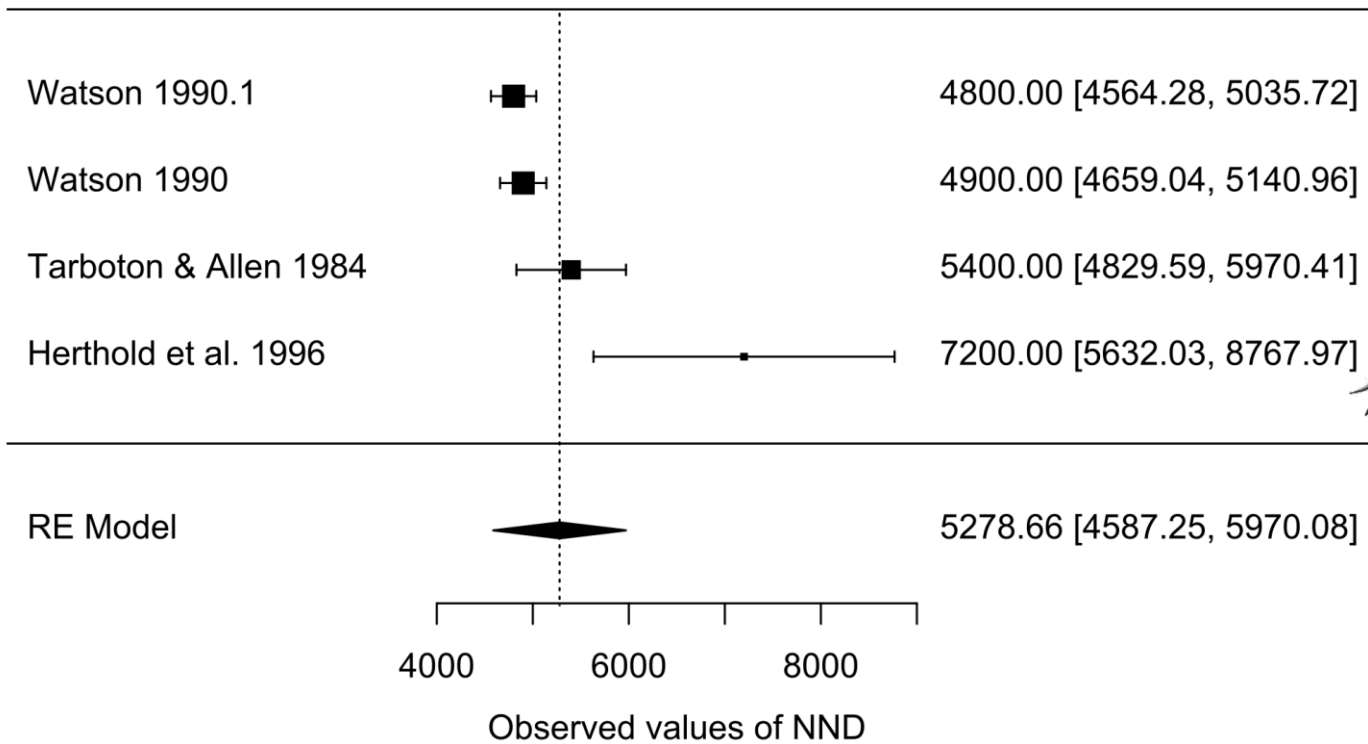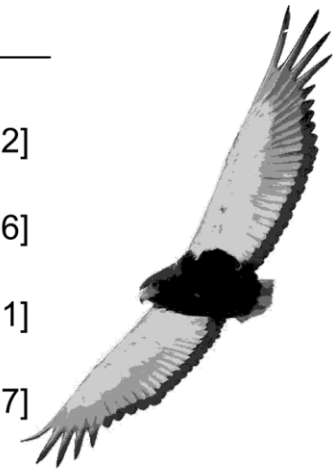

## Geranoaetus melanoleucus

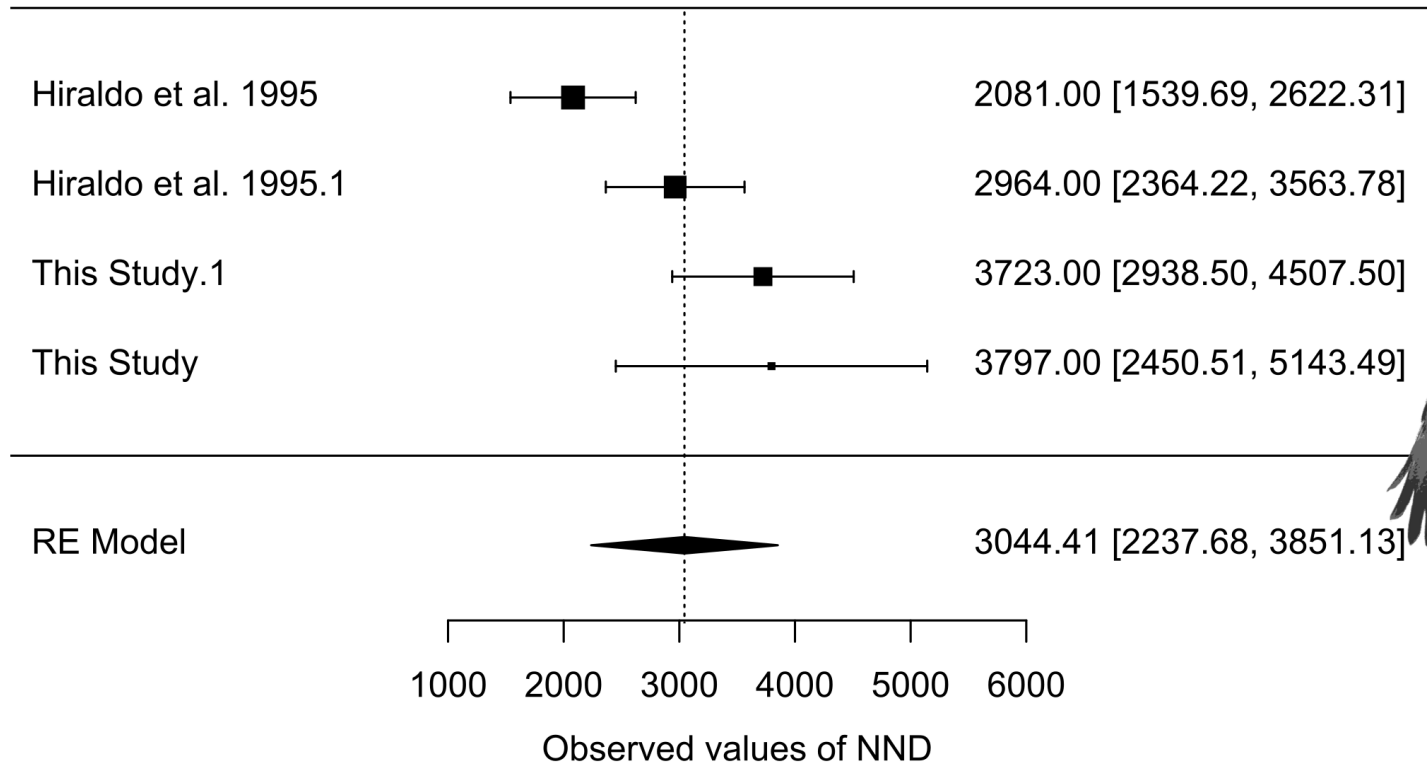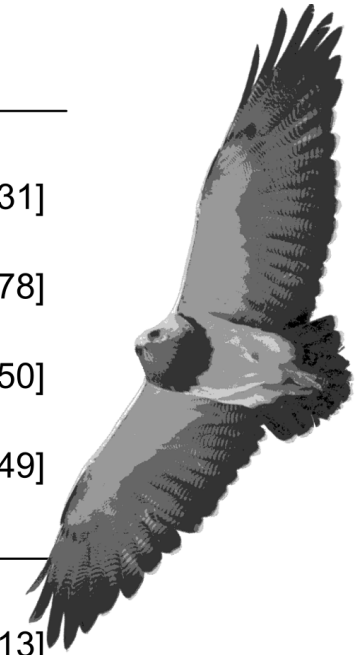

## Aquila heliaca

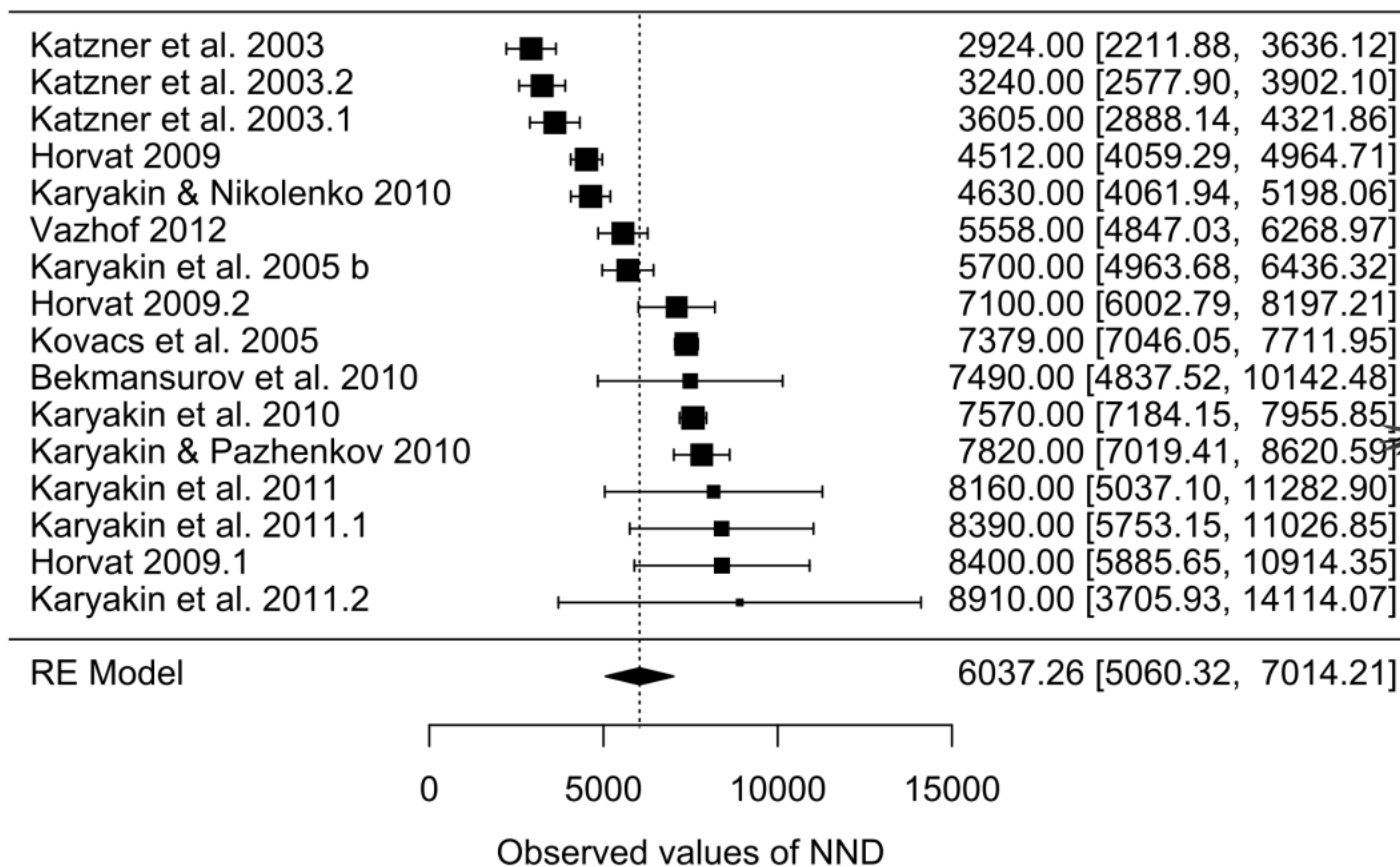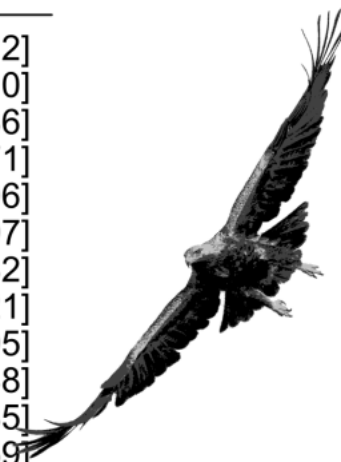

## Aquila verreauxii

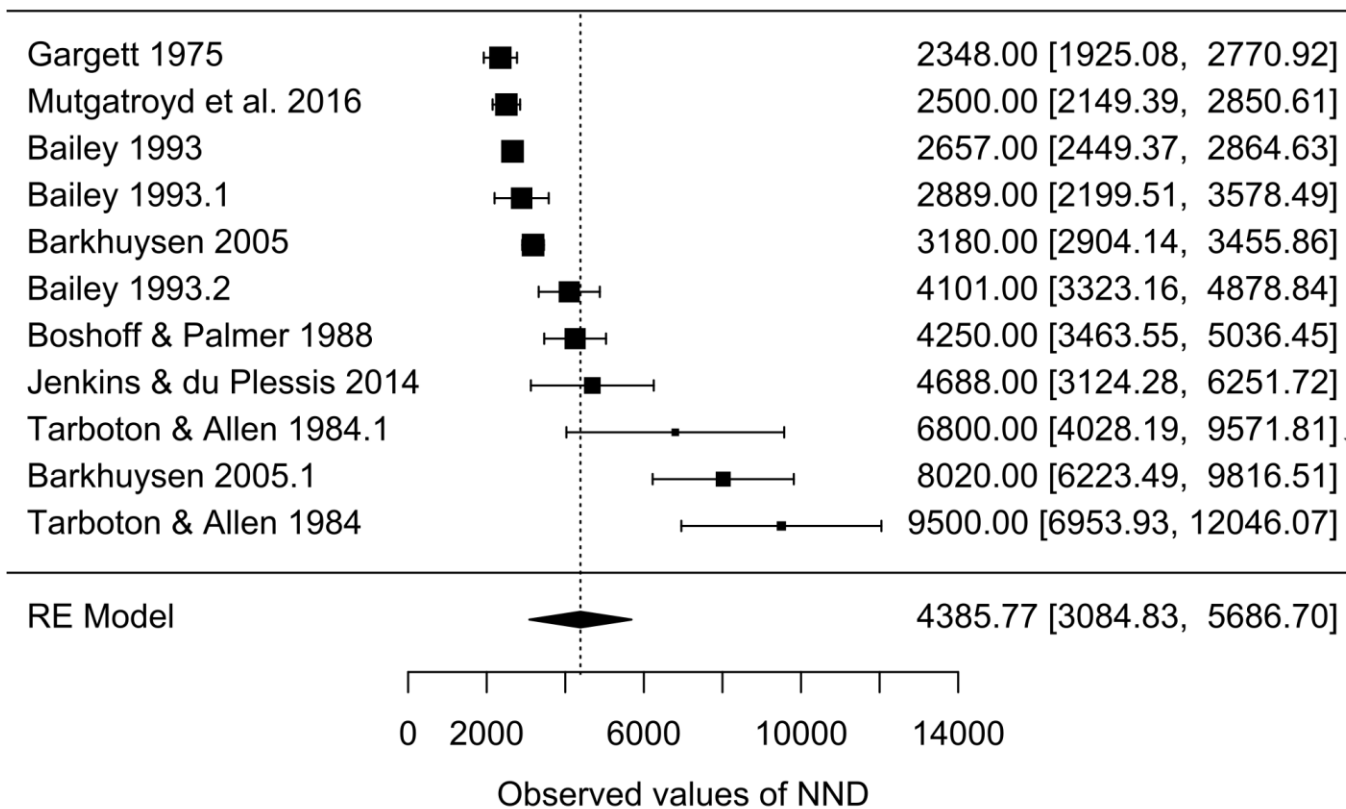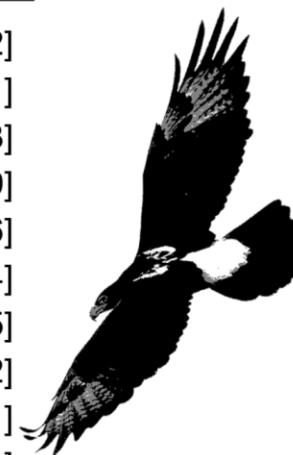

# Aquila chrysaetos

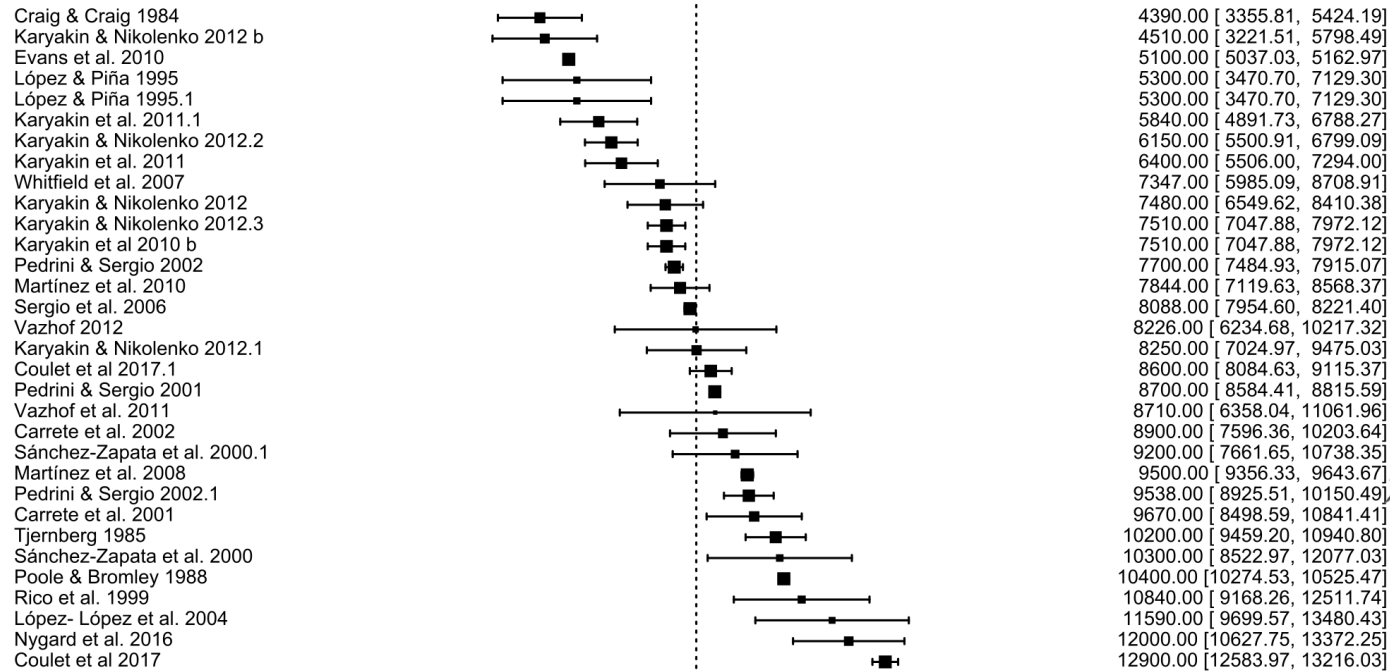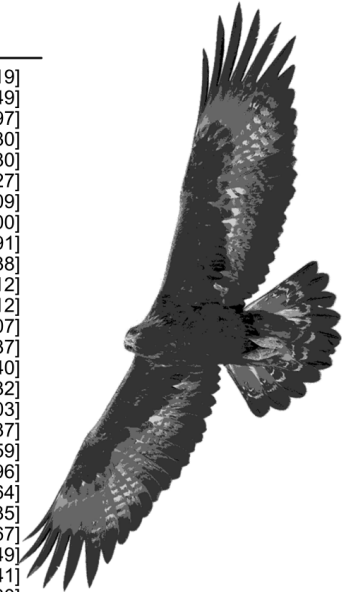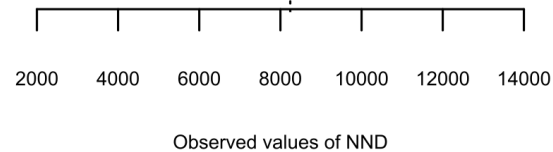

Supplement: Supporting_file_Meta-analysis_Raw_data_in_Table_and_Figures.zip [file Supporting_file_Meta-analysis_Raw_data_in_Table_and_Figures.zip]
